# Supplementary material for: Serotype-specific Binding Properties and Nanoparticle Characteristics Contribute to the Immunogenicity of rAAV1 Vectors
Source: PubMed Central journal article supplement — Mol Ther. 2015 May 5;23(6):1022–33. doi: 10.1038/mt.2015.59 (PMC4817752; doi:10.1038/mt.2015.59), 2015-05-05

## Supplementary Materials:

### Figure S1: Antigenic presentation and T cell activation controls

(a) Antigenic presentation by different populations of APCs was measured *in vitro* by pre-incubating CD11c<sup>+</sup> (black circle), CD11b<sup>+</sup> (triangle) or CD19<sup>+</sup> (square) spleen cells with (+) or without (-) the Dby peptide and adding CFSE-stained Dby-specific CD4<sup>+</sup>T cells for 3 days. The percentage of dividing CFSE-stained T cells was estimated by FACS using the gating strategy indicated on the left part of the Figure. Data from 6 experiments are represented on the right panel. Dots represent individual mouse data and horizontal bars indicate the average value.

(b) Antigenic presentation of the capsid (left panel) and T cell activation by the capsid (right panel) were tested after IM injections of the rAAV1-DBY vector in different conditions. In the left panel, antigenic presentation from CD11c<sup>+</sup>, CD11b<sup>+</sup>, or CD19<sup>+</sup> cells was tested in C57BL/6 mice as described in Figure 1b and averaged results of 2 experiments are represented with standard deviation. In the right panel, the role of CD11c<sup>+</sup> cells in anti-capsid CD4<sup>+</sup> T cell responses was investigated in the CD11c-DTR chimeric model by measuring IFN- $\gamma$  response as in Figure 1a but testing the draining lymph node (pool of popliteal and inguinal lymph node) instead of spleen of mice 8 days after IM administration of rAAV1-DBY vector ( $5 \cdot 10^9$  vg/mice). Each point represent individual mouse data and horizontal bars indicate the average value.

(c) Serotype-specific effects are shown as rAAV8 is capable of inducing anti-transgene T cell immune responses regardless of NA digestion. NA-treated (+) or not (-)CD11c<sup>+</sup> cells were incubated with rAAV8-SGCA-HY and were injected into C57BL/6 mice. T cell responses were measured by IFN- $\gamma$ ELISPOT 14 days after injection. Data are representative of 2 experiments with 3 mice per group. Dots represent individual mouse data and horizontal bars indicate the average value.

### Figure S2: Gating strategies and control of acid sialic removal on CD11c<sup>+</sup>CD8 $\alpha$ <sup>+</sup> and CD11b<sup>+</sup>F4/80<sup>+</sup>

(a) Representative dot plots and histograms with gating strategies that were used in Figures 3 and 4. Total splenocytes were first incubated with anti-CD11c-magnetic beads and CD11c<sup>+</sup> cells were purified by automatic magnetic cell sorting. The residual unselected cells were labeled with anti-CD11b-magnetic beads to purify CD11b<sup>+</sup> cells. B lymphocytes were obtained from residual unselected cells from these 2 prior steps (i.e. CD11c<sup>-</sup> CD11b<sup>-</sup> cells) using anti-CD19-magnetic beads positive selection. The 3 populations of selected APCs were then stained with various monoclonal antibodies to evaluate other markers and the presence of the rAAV1-alexa488 vector in the cells was measured by FACS.

(b) The removal of sialic acids by NA was controlled by incubating CD11c<sup>+</sup>CD8 $\alpha$ <sup>+</sup> (**left panel**) and CD11b<sup>+</sup>F4/80<sup>+</sup> (**right panel**) cells with fluorescent WGA lectin (5 $\mu$ g/mL) for 1 hour. The mean fluorescence intensity (MFI) of WGA lectin-positive cells was measured by FACS. Dots show the mean  $\pm$  SEM of the MFI in 3 independents experiments.

### Figure S3: Activation of APCs by rAAV1 and nanospheres

These histogram plots correspond to the experiments described in Figure 6 and show the multicolor FACS analyses of sorted CD11c<sup>+</sup> cells or CD11b<sup>+</sup> cells respectively in the left or right panels.

### Figure S4: Clustering representation of PCA

Hierarchical clustering of CD8 $\alpha$ +, CD11b+ CD11c+ and CD11b+, CD11b+F4/80+ subpopulations. Rectangles on the tree plot represent identified major clusters on the basis of the branching distance. Data are representative of three experiments.

**Figure S5: Confocal microscopy analysis showing the presence of rAAV1 in macrophages.**

C57BL/6 mice were injected IV with PBS or with  $10^{13}$  particles of rAAV1 marked with Alexa 633 and after 2 hours, spleens were collected, digested with DNase and CD11b+ cells were enriched by magnetic cell sorting (95% purity), stained with biotinylated anti-mouse F4/80 or isotype control, then Alexa 488-labeled streptavidin and DAPI were added and preparations were analyzed by confocal microscopy (63 $\times$ ). Arrows point to cells containing rAAV1. Inserts magnify representative cells to show F4/80 marking in green, rAAV1 in red and nuclei in blue.

**Figure S1a**

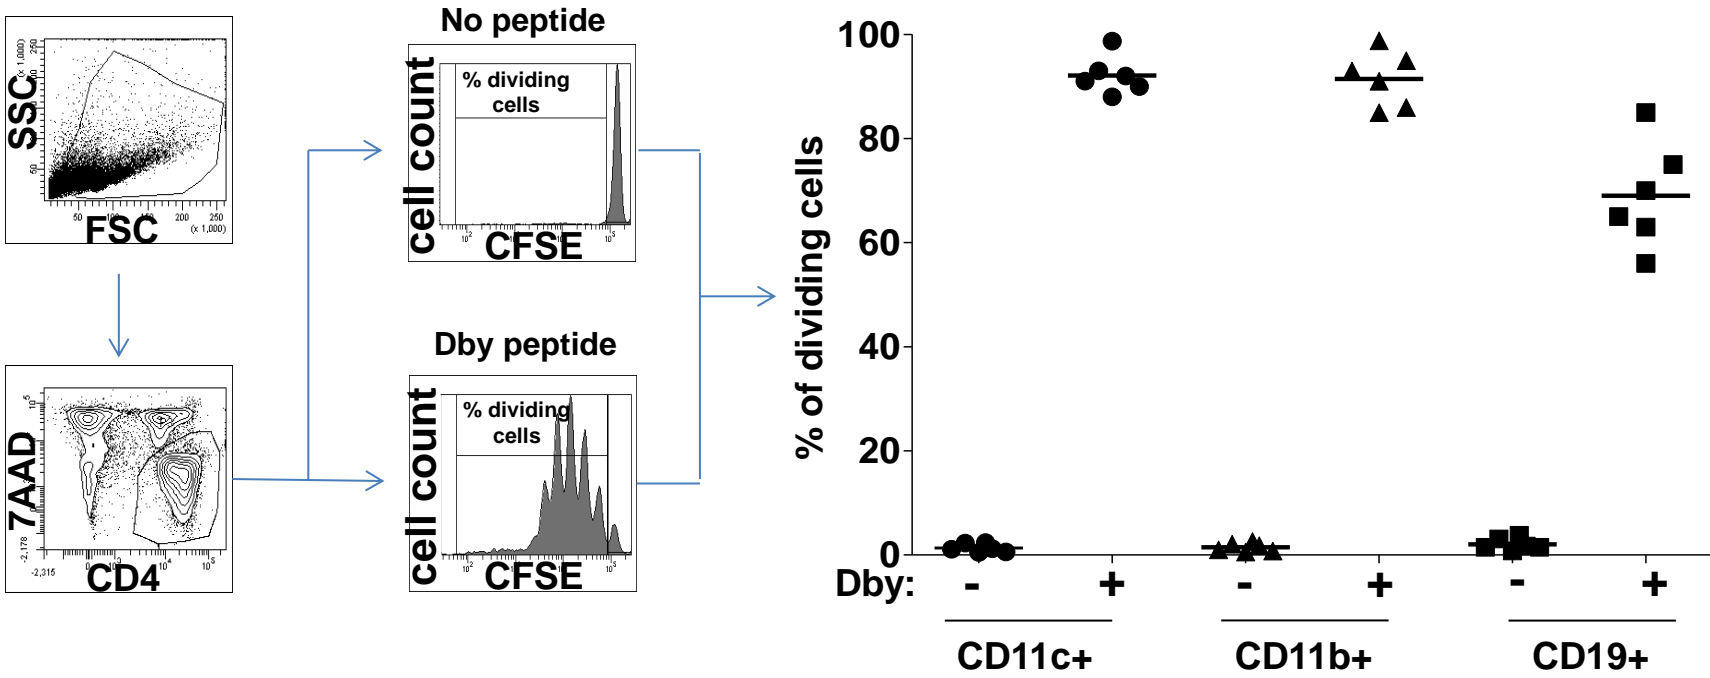

**Figure S1b**

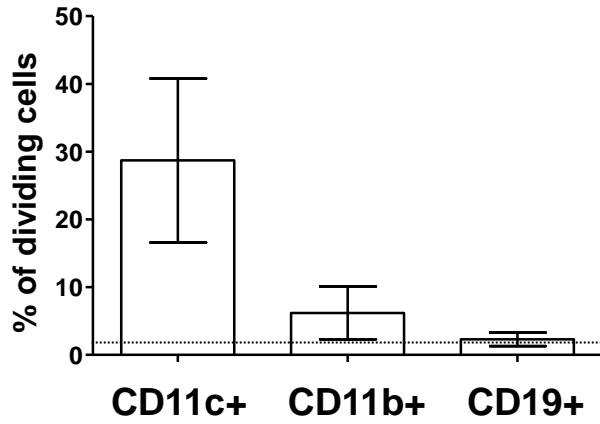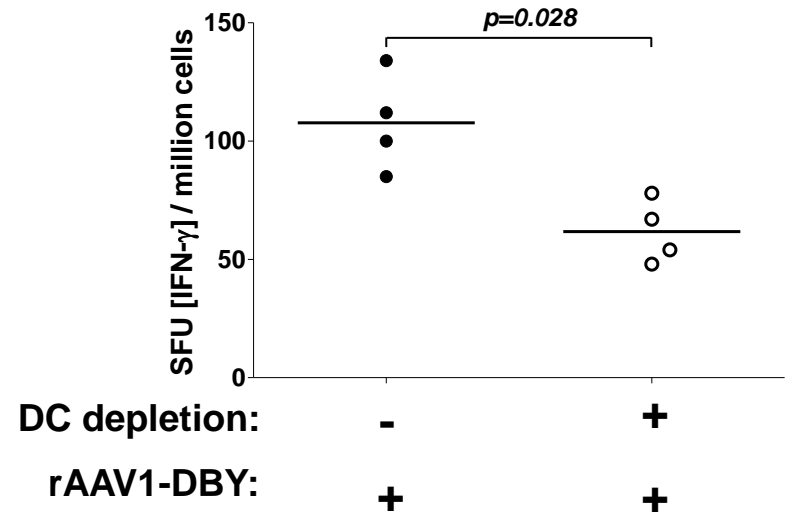

Figure S1c

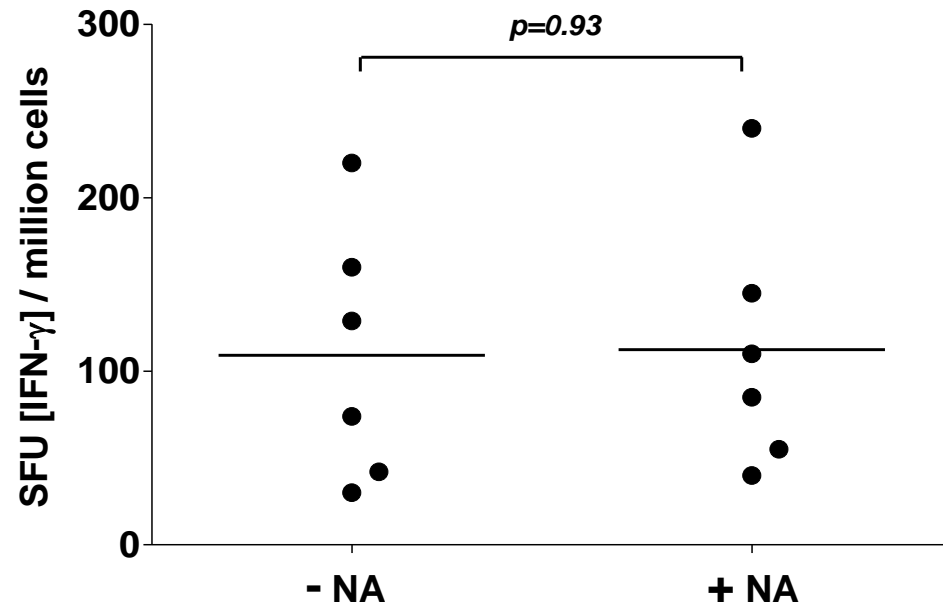

# Figure S2a

Total spleen cells

Sequential magnetic cell sorting

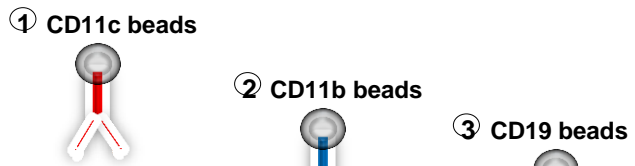

CD11c+

CD11b+

CD19+

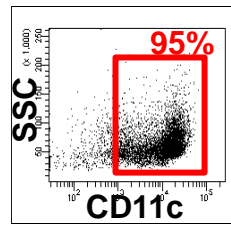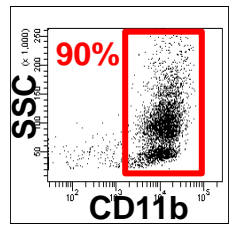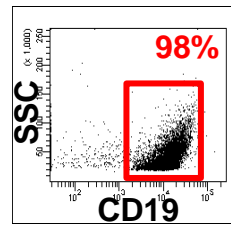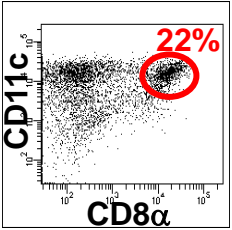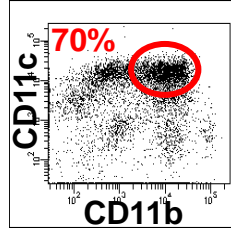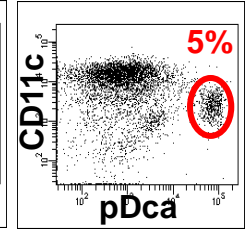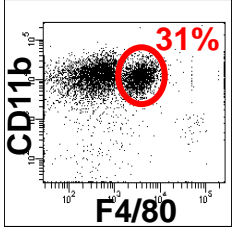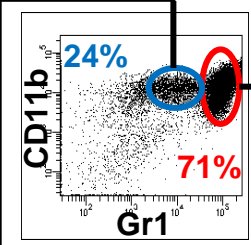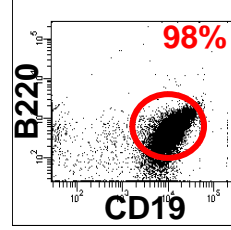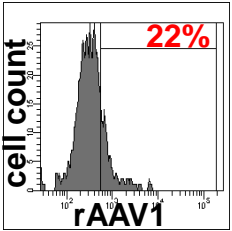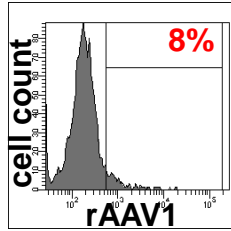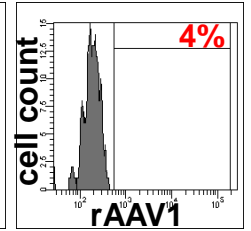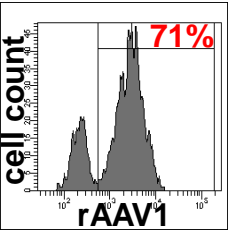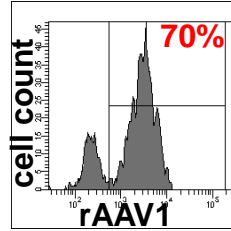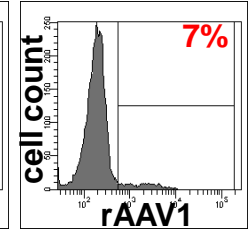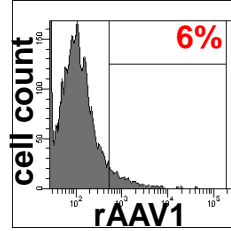

**Figure S2b**

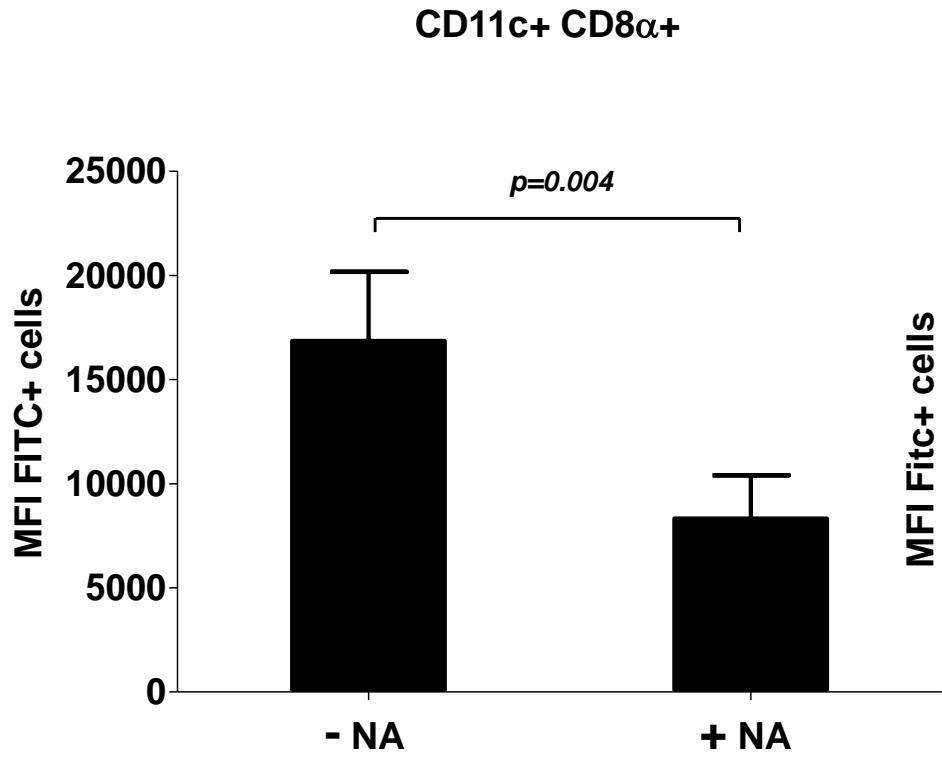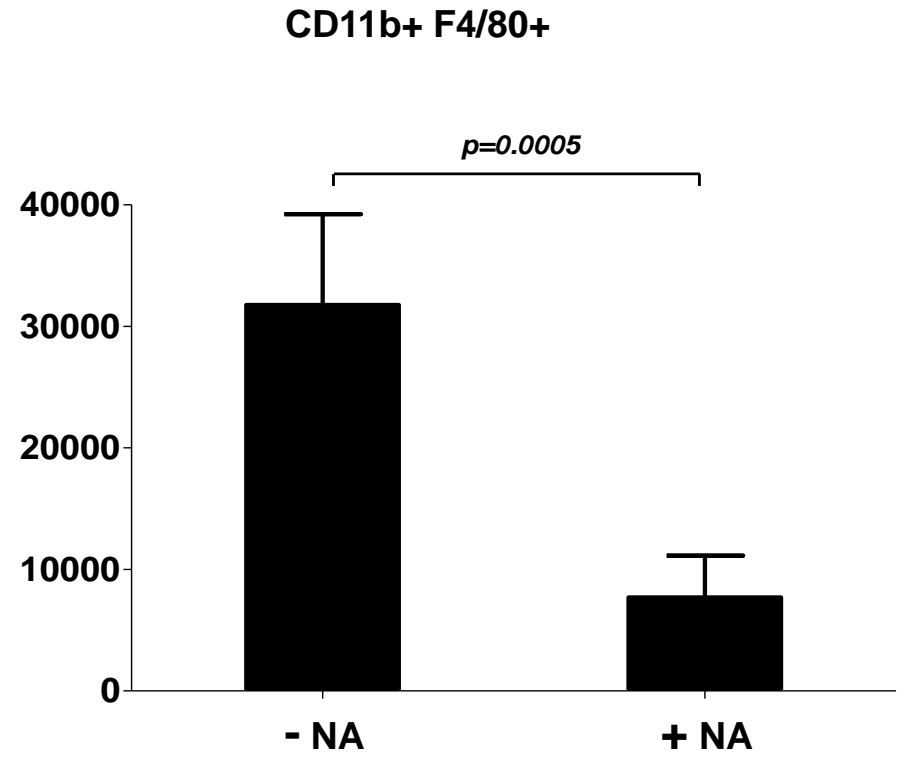

**Figure S3**

**CD11c+ cells**

**CD11b+ cells**

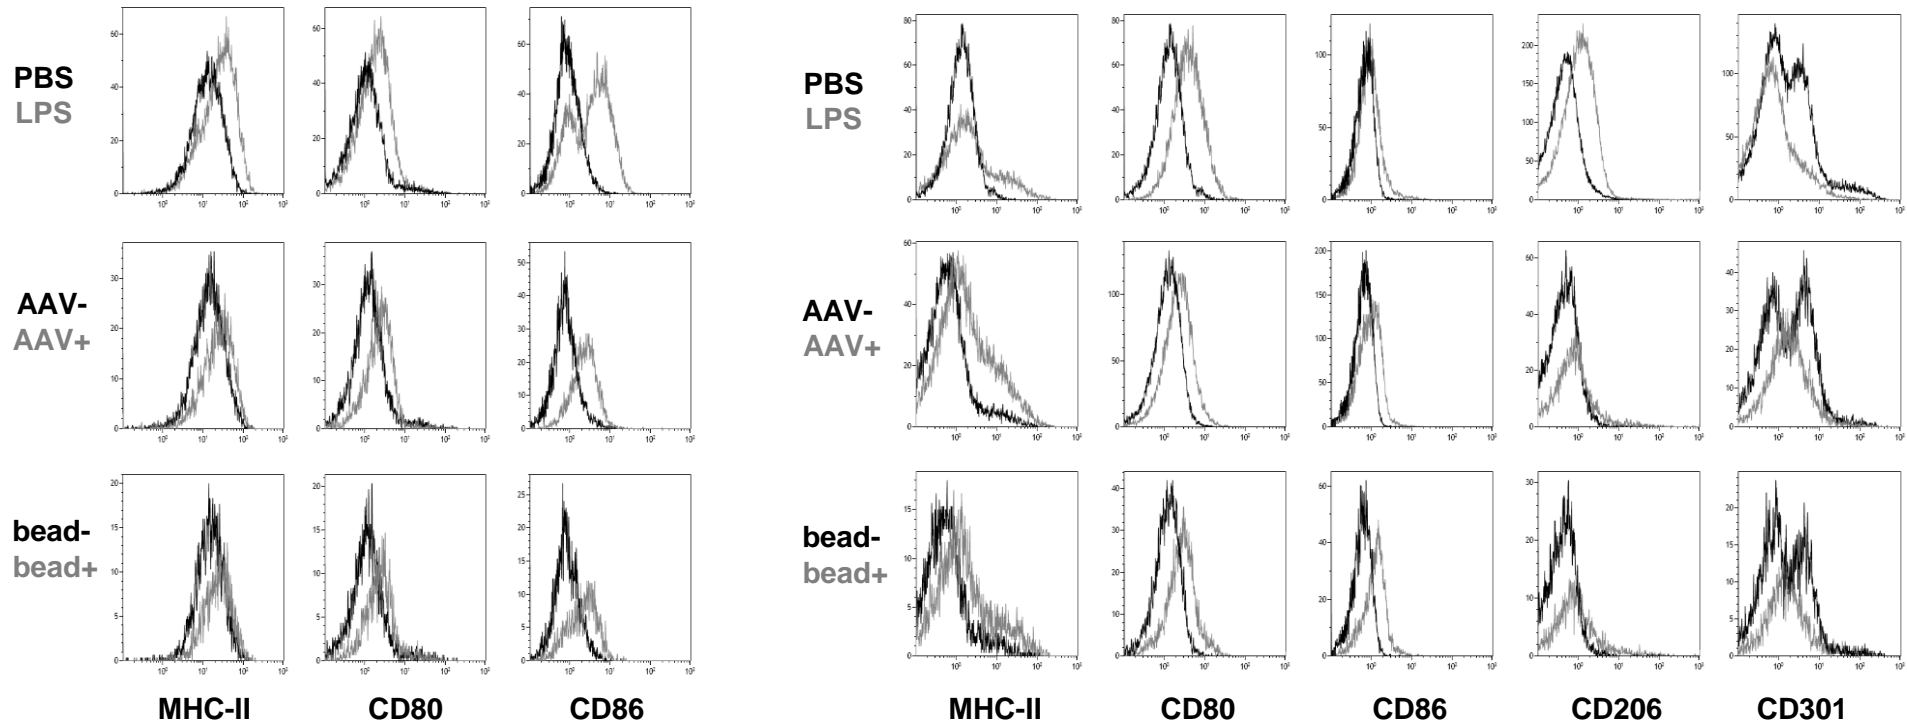



**Figure S4**

**CD11c+CD8 $\alpha$ + / CD11c+CD11b+**

**Hierarchical clustering**

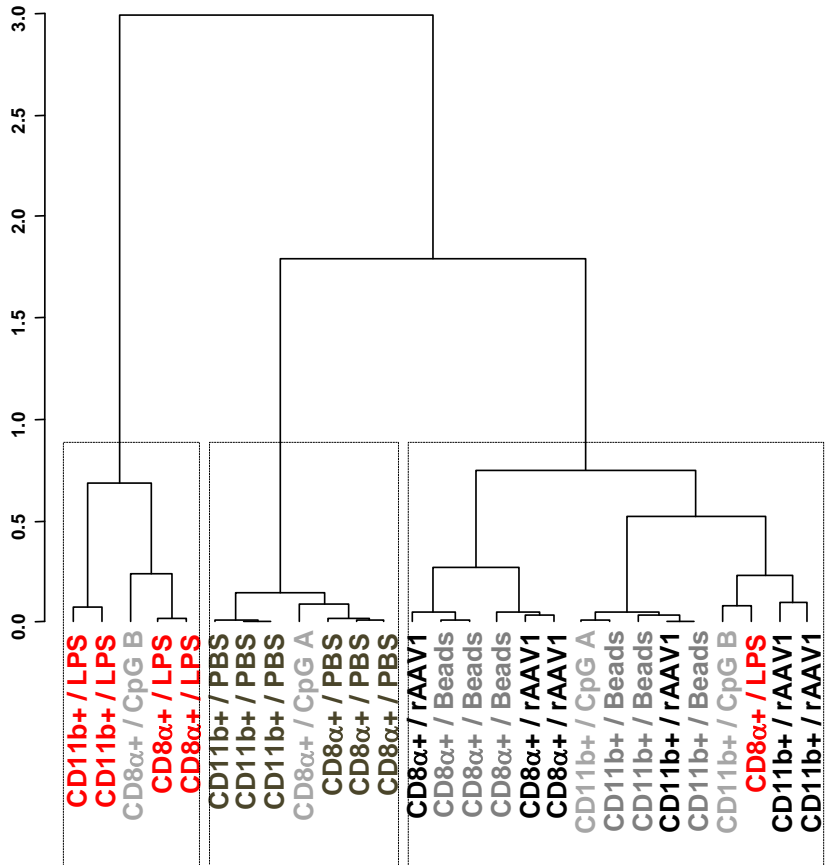

**PBS    nanospheres    rAAV1    CpG A    CpG B    LPS**

**CD11b+ / CD11b+F4/80+**

**Hierarchical clustering**

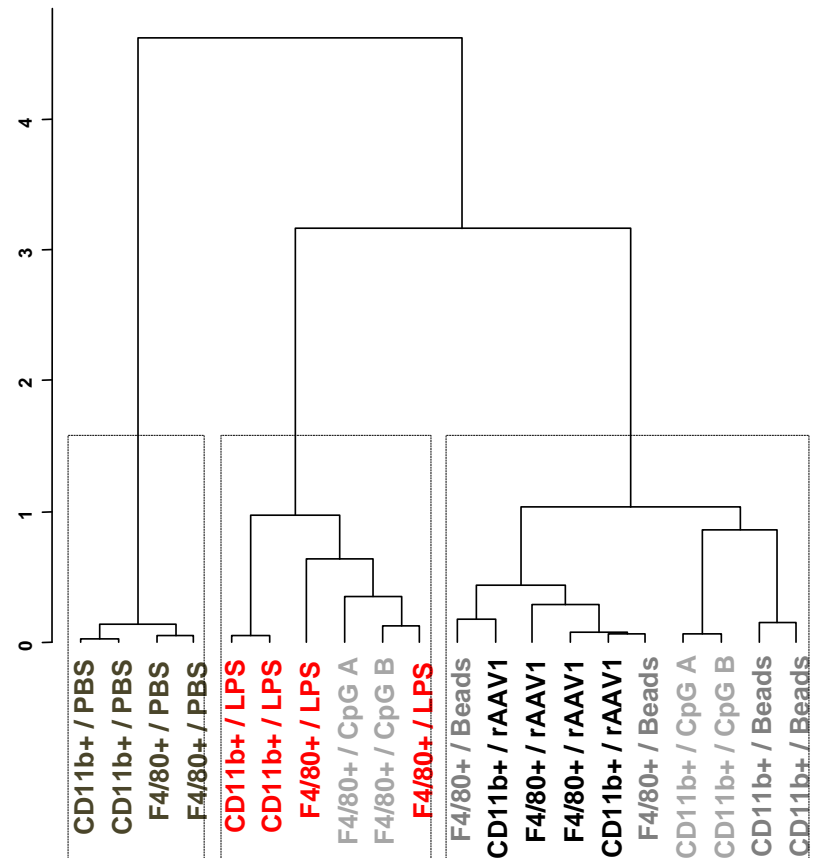

**Figure S5**

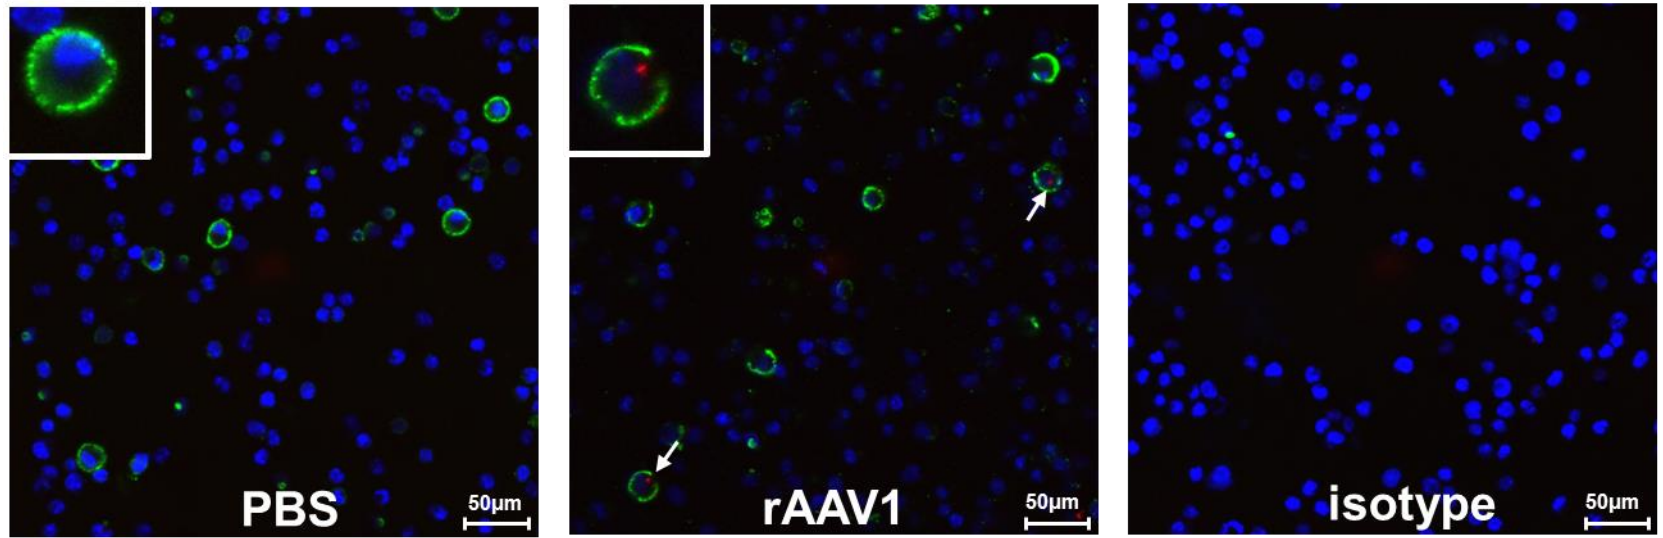

Supplement: mt201559x1.pdf [file mt201559x1.pdf]
